# Supplementary material for: Ag nanoparticles supported on nickel foam: a flexible 3D electrode for methanol electrocatalytic oxidation
Source: Royal Society of Chemistry journal article supplement (doi:10.1039/c7ra06656b), 2017-01-01
Supplement: c7ra06656b1.pdf [file c7ra06656b1.pdf]

# Ag nanoparticles supported on nickel foam: a flexible 3D electrode for methanol electrocatalytic oxidation

Yanan Yu<sup>a</sup>, Yu Cheng<sup>a</sup>, Meisong Guo<sup>a</sup>, Chenzhong Li<sup>c</sup>, Jingbo Hu<sup>a,b,\*</sup>

<sup>a</sup>College of Chemistry, Beijing Normal University, Beijing 100875, PR China

<sup>b</sup>Key Laboratory of Beam Technology and Material Modification of Ministry of Education, Beijing Normal University, Beijing 100875, PR China

<sup>c</sup>Nanobioengineering/Nanobioelectronics Laboratory, Department of Biomedical Engineering, Florida International University, 10555 West Flagler Street, Miami, FL 33174, USA

\*e-mail: hujingbo@bnu.edu.cn

## Supplementary Material

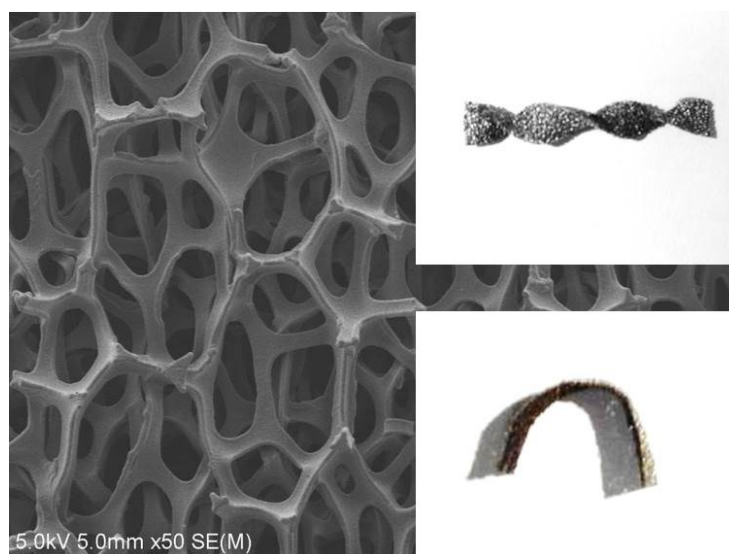

Fig. S1 Low-magnification SEM image of bare nickel foam. Inset: spiral and half arc of N-AgNPs/NF.

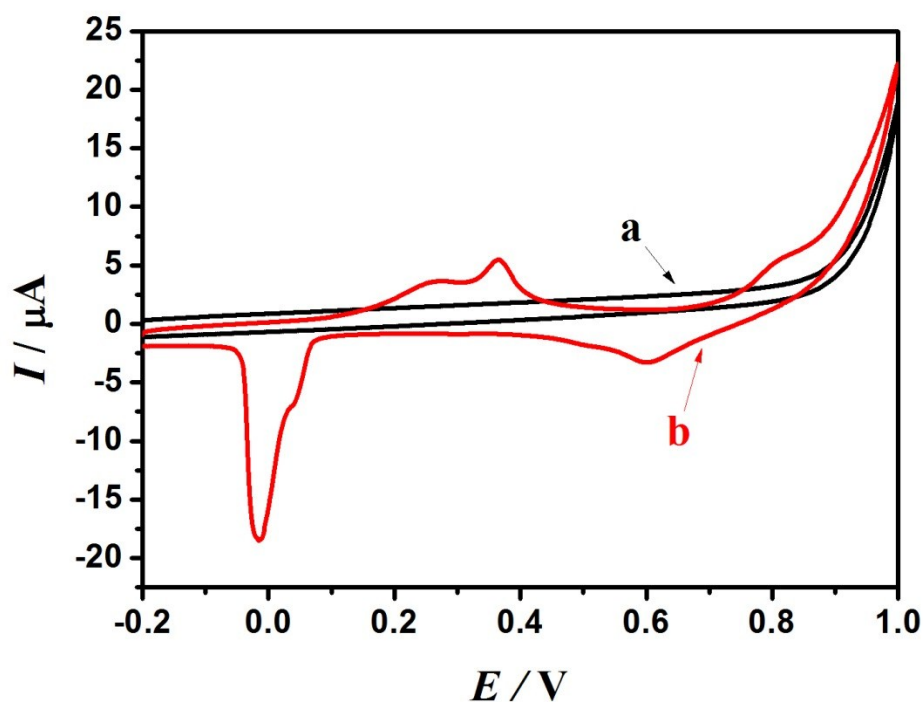

Fig. S2 CV of the N- ITO (a) and the N-AgNPs/ITO (b) in 0.1 M NaOH at a scan rate of 100 mV s<sup>-1</sup>.

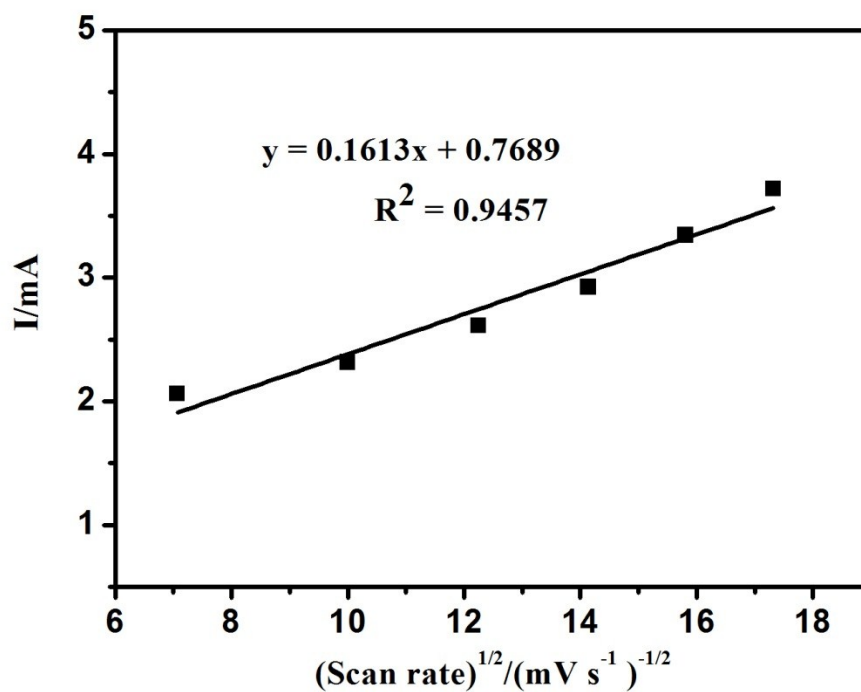

Fig. S3 The peak currents are proportional to square root of scan rates. (The AgNPs/NF in 5 mM [Fe(CN)<sub>6</sub>]<sup>3-/4-</sup> at various scan rates of 50 to 300mV s<sup>-1</sup>).

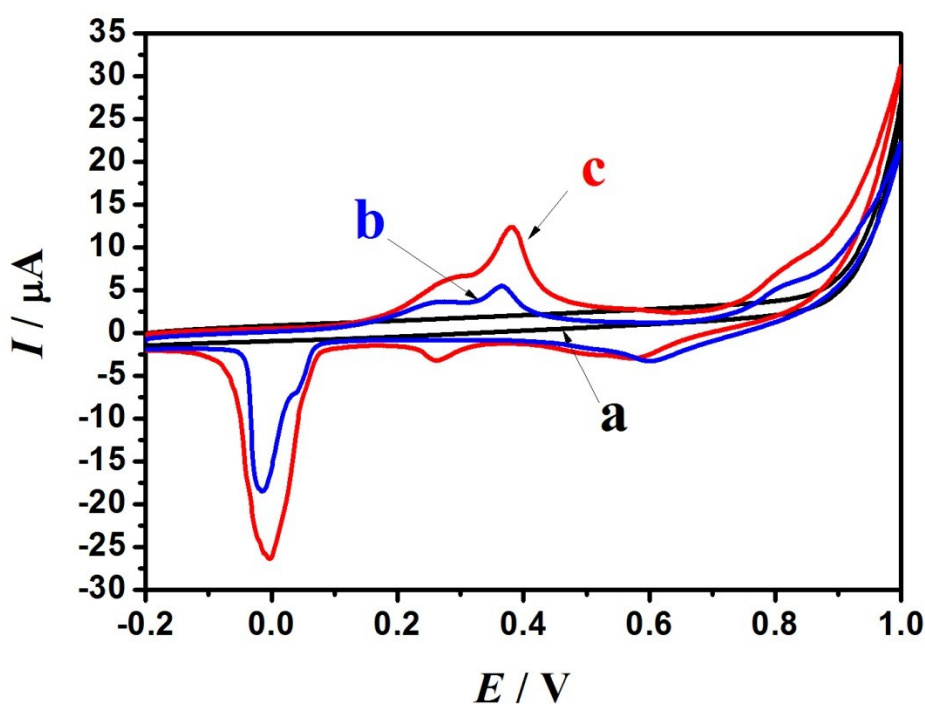

Fig. S4 CV of the N-ITO (a) and N-AgNPs/ITO (c) in the presence of 0.1 M methanol, the N-AgNPs/ITO (b) in the absence of 0.1 M methanol in 0.1 M NaOH. Scan rate: 100 mV s<sup>-1</sup>.

Table S1 Comparison of specific activity between the present AgNPs/NF and the other Ag and Ni modified electrodes reported in references.

| Modified electrode | condition                                                      | Scan rate (mV s <sup>-1</sup> ) | E <sub>a</sub> (V) | I <sub>a</sub>                          | Reference s |
|--------------------|----------------------------------------------------------------|---------------------------------|--------------------|-----------------------------------------|-------------|
| Ag/C               | 0.5 M KOH + 0.5 M CH <sub>3</sub> OH                           | 20                              | 0.75(vs. RHE)      | 16 mA mg <sup>-1</sup> <sub>Ag</sub>    | [1]         |
| PdAg/C             | 0.5 M KOH + 0.5 M CH <sub>3</sub> OH                           | 20                              | 0.43 (vs. RHE)     | 661 mA mg <sup>-1</sup> <sub>Pd</sub>   | [1]         |
| Ag@Pt/C-2          | 0.5 M H <sub>2</sub> SO <sub>4</sub> + 0.5M CH <sub>3</sub> OH | 50                              | 0.85 (vs. Ag/AgCl) | 0.593 mA μg <sup>-1</sup> <sub>Pt</sub> | [2]         |
| Ni/PAN/POAP/Pt     | 0.1MNaOH+ 0.5 M CH <sub>3</sub> OH                             | 100                             | 0.67(vs. SCE)      | 17.83 mA                                | [3]         |
| Ni/3D-G            | 1.0MKOH+0.2 M CH <sub>3</sub> OH                               | 50                              | 0.67 (vs. Hg/HgO)  | 40.45 mA cm <sup>-1</sup>               | [4]         |
| AgNPs/NF           | 0.1MNaOH+ 0.1 M CH <sub>3</sub> OH                             | 100                             | 0.65(vs. Ag/AgCl)  | 172 mA cm <sup>-1</sup>                 | This work   |

## Reference

1. T. Jurzinsky, C. Cremers, K. Pinkwart, J. Tübke, *Electrochimica Acta*, 2016, **199**, 270-279.

2. J. Cao, M. Guo, J. Wu, J. Xu, W. Wang, Z. Chen, *Journal of Power Sources*, 2015, **277**, 155-160.
3. A.-u.-H. Ali Shah, N. Yasmeen, G. Rahman, S. Bilal, *Electrochimica Acta*, 2017, **224**, 468-474.
4. H. Zhu, J. Wang, X. Liu, X. Zhu, *International Journal of Hydrogen Energy*, 2017, **42**, 11206-11214.
